# Supplementary material for: Validation of Induced Microglia-Like Cells (iMG Cells) for Future Studies of Brain Diseases
Source: Front Cell Neurosci. 2021 Apr 9;15:629279. doi: 10.3389/fncel.2021.629279 (PMC8063054; doi:10.3389/fncel.2021.629279)
Supplement: Supplementary Table 2 — Microglia signature genes in this study. [file Table_2.xlsx]

## Sheet: Sheet1
Table S2. Microglial signature genes in this study
GeneID	Reference
TNF	Gosselin et al.
HSPA6	Gosselin et al.
DOCK4-AS1	Gosselin et al.
CAPNS2	Gosselin et al.
LINC00854	Gosselin et al.
FCGR1CP	Gosselin et al.
TLR1	Gosselin et al.
PARP15	Gosselin et al.
LOC100419170	Gosselin et al.
PTCRA	Gosselin et al.
ANKRD22	Gosselin et al.
FAM157A	Gosselin et al.
TCTEX1D4	Gosselin et al.
CLEC7A	Gosselin et al.
NAIP	Gosselin et al.
FAM157C	Gosselin et al.
ACPP	Gosselin et al.
FCGR2C	Gosselin et al.
NAPSB	Gosselin et al.
HELB	Gosselin et al.
HAVCR1	Gosselin et al.
TFEC	Gosselin et al.
MMRN1	Gosselin et al.
ANP32A-IT1	Gosselin et al.
VENTX	Gosselin et al.
TLR5	Gosselin et al.
TMEM106A	Gosselin et al.
LOC101927730	Gosselin et al.
IFNLR1	Gosselin et al.
TLR6	Gosselin et al.
FAM177B	Gosselin et al.
FCGR1A	Gosselin et al.
C9orf66	Gosselin et al.
BNC2	Gosselin et al.
CDCP1	Gosselin et al.
TNFSF18	Gosselin et al.
TLR7	Gosselin et al.
FCAR	Gosselin et al.
TREML1	Gosselin et al.
LINC01468	Gosselin et al.
MS4A14	Gosselin et al.
LOC148696	Gosselin et al.
PTGER4	Gosselin et al.
CIITA	Gosselin et al.
SIGLEC9	Gosselin et al.
C2-AS1	Gosselin et al.
TLR2	Gosselin et al.
LOC105375218	Gosselin et al.
GPRIN3	Gosselin et al.
TLR3	Gosselin et al.
CELF2-AS1	Gosselin et al.
XIRP1	Gosselin et al.
KLHL6	Gosselin et al.
SIGLEC14	Gosselin et al.
TLR8	Gosselin et al.
CLEC5A	Gosselin et al.
DLEU7-AS1	Gosselin et al.
SLC11A1	Gosselin et al.
AS-PTPRE	Gosselin et al.
HIST1H2BG	Gosselin et al.
SIRPB2	Gosselin et al.
LOC100129083	Gosselin et al.
SIGLEC7	Gosselin et al.
CSF2RB	Gosselin et al.
LOC101927069	Gosselin et al.
PTPRC	Gosselin et al.
SCIN	Gosselin et al.
KIR3DX1	Gosselin et al.
ARRDC5	Gosselin et al.
CD84	Gosselin et al.
GPR65	Gosselin et al.
SLC37A2	Gosselin et al.
TMEM236	Gosselin et al.
FGF20	Gosselin et al.
MAMDC2	Gosselin et al.
CCR5	Gosselin et al.
LINC01160	Gosselin et al.
C9orf106	Gosselin et al.
MSLN	Gosselin et al.
F2RL1	Gosselin et al.
LINC01410	Gosselin et al.
TLR10	Gosselin et al.
AANAT	Gosselin et al.
FKSG29	Gosselin et al.
HIST2H2AC	Gosselin et al.
RPGRIP1	Gosselin et al.
TNFSF8	Gosselin et al.
SIGLEC11	Gosselin et al.
CXorf21	Gosselin et al.
LOC102724323	Gosselin et al.
FCGR1B	Gosselin et al.
HPSE	Gosselin et al.
LY75	Gosselin et al.
CD180	Gosselin et al.
ADAM28	Gosselin et al.
IL10	Gosselin et al.
FRRS1	Gosselin et al.
CMKLR1	Gosselin et al.
IGSF6	Gosselin et al.
S100Z	Gosselin et al.
LINC01907	Gosselin et al.
CLEC17A	Gosselin et al.
REL	Gosselin et al.
MRC1	Gosselin et al.
ITGAL	Gosselin et al.
MS4A6A	Gosselin et al.
RUNX1	Gosselin et al.
CCL3L1	Gosselin et al.
LILRB1	Gosselin et al.
EBLN2	Gosselin et al.
C20orf197	Gosselin et al.
PDCD1LG2	Gosselin et al.
BMF	Gosselin et al.
LINC00264	Gosselin et al.
ANKRD36BP1	Gosselin et al.
CCL4	Gosselin et al.
RGS1	Gosselin et al.
TMEM150B	Gosselin et al.
SPTLC3	Gosselin et al.
RAB39A	Gosselin et al.
HSPA7	Gosselin et al.
CCL3	Gosselin et al.
FCGR3B	Gosselin et al.
SIGLEC16	Gosselin et al.
SPN	Gosselin et al.
CCR1	Gosselin et al.
CD300LB	Gosselin et al.
LINC01909	Gosselin et al.
LOC101929331	Gosselin et al.
ANKRD44-IT1	Gosselin et al.
RUNX2	Gosselin et al.
RHOH	Gosselin et al.
TAGAP	Gosselin et al.
CLEC19A	Gosselin et al.
DAPP1	Gosselin et al.
ADAMTSL4-AS1	Gosselin et al.
CD69	Gosselin et al.
ATP8B4	Gosselin et al.
LINC01480	Gosselin et al.
OSM	Gosselin et al.
TMEM154	Gosselin et al.
HIST2H2AB	Gosselin et al.
C5AR2	Gosselin et al.
ZFPM2-AS1	Gosselin et al.
CD300LF	Gosselin et al.
IL1A	Gosselin et al.
TBC1D3P1-DHX40P1	Gosselin et al.
CD300C	Gosselin et al.
LOC729737	Gosselin et al.
KCNJ5	Gosselin et al.
RIPK3	Gosselin et al.
PTGER4P2-CDK2AP2P2	Gosselin et al.
WDFY4	Gosselin et al.
C5orf58	Gosselin et al.
B3GNT5	Gosselin et al.
CTLA4	Gosselin et al.
PTAFR	Gosselin et al.
ADGRE2	Gosselin et al.
CYBB	Gosselin et al.
GPR34	Gosselin et al.
SERPINB9P1	Gosselin et al.
CACNA2D4	Gosselin et al.
CD226	Gosselin et al.
ARL11	Gosselin et al.
NABP1	Gosselin et al.
PIK3CG	Gosselin et al.
LOC100506142	Gosselin et al.
GPR84	Gosselin et al.
PSTPIP2	Gosselin et al.
ALPK1	Gosselin et al.
LILRA2	Gosselin et al.
SCIMP	Gosselin et al.
CCL3L3	Gosselin et al.
HIST2H2BF	Gosselin et al.
CD86	Gosselin et al.
SP140	Gosselin et al.
TMEM156	Gosselin et al.
RNASE2	Gosselin et al.
PIK3R5	Gosselin et al.
PLBD1	Gosselin et al.
LOC101928304	Gosselin et al.
ITGB3	Gosselin et al.
TTN-AS1	Gosselin et al.
SERPINA1	Gosselin et al.
DPRXP4	Gosselin et al.
TRPC2	Gosselin et al.
SLFN12	Gosselin et al.
FPR2	Gosselin et al.
SUCNR1	Gosselin et al.
LINC00578	Gosselin et al.
MB21D1	Gosselin et al.
RBM47	Gosselin et al.
DOCK11	Gosselin et al.
MS4A7	Gosselin et al.
PIK3R6	Gosselin et al.
APOC4	Gosselin et al.
ACSM5	Gosselin et al.
SAMSN1	Gosselin et al.
C3AR1	Gosselin et al.
PLXDC2	Gosselin et al.
OCLM	Gosselin et al.
SFT2D2	Gosselin et al.
ARL5C	Gosselin et al.
CEACAM21	Gosselin et al.
ELF4	Gosselin et al.
FCGR2A	Gosselin et al.
DOCK8	Gosselin et al.
C16orf54	Gosselin et al.
LAIR1	Gosselin et al.
AOAH	Gosselin et al.
MS4A4A	Gosselin et al.
SLC16A5	Gosselin et al.
CPED1	Gosselin et al.
IL1RN	Gosselin et al.
CLDN7	Gosselin et al.
CPVL	Gosselin et al.
FPR1	Gosselin et al.
SNX20	Gosselin et al.
CCL4L2	Gosselin et al.
SYTL3	Gosselin et al.
PLAG1	Gosselin et al.
BTK	Gosselin et al.
ALOX5	Gosselin et al.
SAMD9	Gosselin et al.
HLA-DRB5	Gosselin et al.
BTBD19	Gosselin et al.
FGD2	Gosselin et al.
LOC100506691	Gosselin et al.
OR52N4	Gosselin et al.
CD33	Gosselin et al.
CCL4L1	Gosselin et al.
ABCB4	Gosselin et al.
DIP2A-IT1	Gosselin et al.
GHRL	Gosselin et al.
GAB3	Gosselin et al.
ANKRD18DP	Gosselin et al.
PARVG	Gosselin et al.
MNDA	Gosselin et al.
SIGLEC8	Gosselin et al.
HLA-DMB	Gosselin et al.
COL8A2	Gosselin et al.
CTSC	Gosselin et al.
MSR1	Gosselin et al.
PLA2G7	Gosselin et al.
CATIP-AS1	Gosselin et al.
C19orf35	Gosselin et al.
FGL1	Gosselin et al.
SIGLEC10	Gosselin et al.
LILRA1	Gosselin et al.
EGR2	Gosselin et al.
RNASE3	Gosselin et al.
PSMD6-AS2	Gosselin et al.
CYSLTR1	Gosselin et al.
HAVCR2	Gosselin et al.
ZNF121	Gosselin et al.
IL10RA	Gosselin et al.
LPCAT2	Gosselin et al.
ZNF321P	Gosselin et al.
DOCK2	Gosselin et al.
LOC153684	Gosselin et al.
VSIG4	Gosselin et al.
CD274	Gosselin et al.
LOC101929798	Gosselin et al.
TIGD4	Gosselin et al.
IL18	Gosselin et al.
PCED1B-AS1	Gosselin et al.
TNFRSF10C	Gosselin et al.
CYTIP	Gosselin et al.
NFATC2	Gosselin et al.
CCRL2	Gosselin et al.
STAB1	Gosselin et al.
BLNK	Gosselin et al.
PLEK	Gosselin et al.
LRP1-AS	Gosselin et al.
MICB	Gosselin et al.
LRRC25	Gosselin et al.
TGFBR1	Gosselin et al.
MIS18BP1	Gosselin et al.
RGS18	Gosselin et al.
LOC101929117	Gosselin et al.
EBI3	Gosselin et al.
TNFRSF13C	Gosselin et al.
TMC8	Gosselin et al.
GPR183	Gosselin et al.
HIST2H2BA	Gosselin et al.
MILR1	Gosselin et al.
HLA-DOA	Gosselin et al.
NCF4	Gosselin et al.
APOBR	Gosselin et al.
MPEG1	Gosselin et al.
LOC101928429	Gosselin et al.
C3	Gosselin et al.
ZNF816-ZNF321P	Gosselin et al.
RASGRP4	Gosselin et al.
IL6R	Gosselin et al.
C2	Gosselin et al.
ADORA3	Gosselin et al.
SP140L	Gosselin et al.
NFAM1	Gosselin et al.
LILRB4	Gosselin et al.
BMP2K	Gosselin et al.
NCKAP1L	Gosselin et al.
CARD11	Gosselin et al.
FAM60A	Gosselin et al.
TNFRSF11A	Gosselin et al.
MASCRNA	Gosselin et al.
SLC2A5	Gosselin et al.
IKZF1	Gosselin et al.
SH3TC1	Gosselin et al.
RAB38	Gosselin et al.
USP6	Gosselin et al.
VAV1	Gosselin et al.
GAPT	Gosselin et al.
BCL2A1	Gosselin et al.
IL12RB1	Gosselin et al.
M1AP	Gosselin et al.
ITGB2-AS1	Gosselin et al.
NRROS	Gosselin et al.
TRAF3IP3	Gosselin et al.
FCGR3A	Gosselin et al.
STK26	Gosselin et al.
MYO7A	Gosselin et al.
CSF1R	Gosselin et al.
TNFRSF10A	Gosselin et al.
DDX60L	Gosselin et al.
SLC7A7	Gosselin et al.
ACKR2	Gosselin et al.
MKNK1-AS1	Gosselin et al.
ZNF90	Gosselin et al.
CD300A	Gosselin et al.
PTGS1	Gosselin et al.
SLC2A9	Gosselin et al.
ADPGK-AS1	Gosselin et al.
SLC1A5	Gosselin et al.
ITGAX	Gosselin et al.
NFKBIZ	Gosselin et al.
CASS4	Gosselin et al.
CTSS	Gosselin et al.
TRIM34	Gosselin et al.
RHBDF2	Gosselin et al.
SRGAP2B	Gosselin et al.
LINC01176	Gosselin et al.
CH25H	Gosselin et al.
LPAR6	Gosselin et al.
TBXAS1	Gosselin et al.
ST8SIA4	Gosselin et al.
ITGA9	Gosselin et al.
BMS1P4	Gosselin et al.
ITGAM	Gosselin et al.
CISH	Gosselin et al.
CEP295NL	Gosselin et al.
PLA2G4A	Gosselin et al.
PRAM1	Gosselin et al.
EMB	Gosselin et al.
ADGRG5	Gosselin et al.
ADCY7	Gosselin et al.
NUAK2	Gosselin et al.
MAP3K8	Gosselin et al.
RBM12B-AS1	Gosselin et al.
IRAK3	Gosselin et al.
PIK3AP1	Gosselin et al.
LOC101928517	Gosselin et al.
TOR4A	Gosselin et al.
TRIM6-TRIM34	Gosselin et al.
ADRB2	Gosselin et al.
PATL2	Gosselin et al.
LOC102724297	Gosselin et al.
ITGB2	Gosselin et al.
P2RY6	Gosselin et al.
NRIR	Gosselin et al.
LINC01268	Gosselin et al.
FCGBP	Gosselin et al.
CD14	Gosselin et al.
C10orf55	Gosselin et al.
LINC00671	Gosselin et al.
RNVU1-15	Gosselin et al.
RASSF1-AS1	Gosselin et al.
TAL1	Gosselin et al.
TMPPE	Gosselin et al.
NCF2	Gosselin et al.
GPR132	Gosselin et al.
BIN2	Gosselin et al.
ERN1	Gosselin et al.
KCNK6	Gosselin et al.
DIAPH2	Gosselin et al.
RNVU1-14	Gosselin et al.
LOC101927954	Gosselin et al.
KCNK13	Gosselin et al.
ZNF124	Gosselin et al.
HHEX	Gosselin et al.
LPAR5	Gosselin et al.
PRRG4	Gosselin et al.
ARHGAP25	Gosselin et al.
OTUD1	Gosselin et al.
PLCB2	Gosselin et al.
NCF1	Gosselin et al.
IRF5	Gosselin et al.
THEMIS2	Gosselin et al.
LINC01150	Gosselin et al.
KBTBD12	Gosselin et al.
SOCS6	Gosselin et al.
CYTH4	Gosselin et al.
LOC399715	Gosselin et al.
ERP27	Gosselin et al.
LOC105369438	Gosselin et al.
IKBIP	Gosselin et al.
OLFML2B	Gosselin et al.
LOC100507006	Gosselin et al.
ABCC4	Gosselin et al.
SIGLEC5	Gosselin et al.
EVI2B	Gosselin et al.
TRIM38	Gosselin et al.
HIST1H3D	Gosselin et al.
UHRF1	Gosselin et al.
C11orf45	Gosselin et al.
PLVAP	Gosselin et al.
TFCP2L1	Gosselin et al.
SLCO2B1	Gosselin et al.
RASAL3	Gosselin et al.
LOC101929719	Gosselin et al.
LNPEP	Gosselin et al.
TMEM255B	Gosselin et al.
SYK	Gosselin et al.
LHFPL2	Gosselin et al.
ZC3H12D	Gosselin et al.
LILRB2	Gosselin et al.
DENND2D	Gosselin et al.
SELL	Gosselin et al.
LILRB3	Gosselin et al.
FGL2	Gosselin et al.
LOC374443	Gosselin et al.
C1orf112	Gosselin et al.
SASH3	Gosselin et al.
LCP2	Gosselin et al.
LOC100506178	Gosselin et al.
LOC105372397	Gosselin et al.
ARID3A	Gosselin et al.
MYO1F	Gosselin et al.
PLCG2	Gosselin et al.
FAM129A	Gosselin et al.
HIST1H2BF	Gosselin et al.
CSF3R	Gosselin et al.
NLRP3	Gosselin et al.
ARHGAP30	Gosselin et al.
CARD9	Gosselin et al.
TRIM22	Gosselin et al.
SOAT1	Gosselin et al.
CHEK2	Gosselin et al.
DSC2	Gosselin et al.
ZNF217	Gosselin et al.
PPP4R1L	Gosselin et al.
HK2	Gosselin et al.
P2RY13	Gosselin et al.
LOC102724163	Gosselin et al.
ADAMTSL4	Gosselin et al.
CD53	Gosselin et al.
RNASEH2B-AS1	Gosselin et al.
LOC101927865	Gosselin et al.
HCK	Gosselin et al.
OLR1	Gosselin et al.
STEAP3	Gosselin et al.
CARD14	Gosselin et al.
NLRC4	Gosselin et al.
RNASE6	Gosselin et al.
LIPG	Gosselin et al.
ADAP2	Gosselin et al.
IL1B	Gosselin et al.
CC2D2B	Gosselin et al.
CABP4	Gosselin et al.
DISP1	Gosselin et al.
WNT5A	Gosselin et al.
TRPM2-AS	Gosselin et al.
TYMP	Gosselin et al.
ZBTB37	Gosselin et al.
LOC102724360	Gosselin et al.
TNFRSF1B	Gosselin et al.
IRF8	Gosselin et al.
PTPN6	Gosselin et al.
CYP2S1	Gosselin et al.
LAT2	Gosselin et al.
ARHGAP9	Gosselin et al.
OSCAR	Gosselin et al.
KCNE3	Gosselin et al.
CX3CR1	Gosselin et al.
FAM105A	Gosselin et al.
TBX19	Gosselin et al.
RPL23AP64	Gosselin et al.
ST14	Gosselin et al.
RNVU1-4	Gosselin et al.
LOC105371414	Gosselin et al.
SP100	Gosselin et al.
LILRA4	Gosselin et al.
TIFA	Gosselin et al.
SFMBT2	Gosselin et al.
KCNQ1	Gosselin et al.
PSORS1C3	Gosselin et al.
CYTL1	Gosselin et al.
LINC01141	Gosselin et al.
GALNT4	Gosselin et al.
TMEM119	Gosselin et al.
RNVU1-20	Gosselin et al.
ZNF600	Gosselin et al.
C19orf38	Gosselin et al.
ATP7A	Gosselin et al.
IL2RG	Gosselin et al.
LINC00921	Gosselin et al.
LRRC37A6P	Gosselin et al.
GSN-AS1	Gosselin et al.
IL4I1	Gosselin et al.
RTTN	Gosselin et al.
CARD6	Gosselin et al.
NCF1C	Gosselin et al.
GLUD1P3	Gosselin et al.
ITPRIPL1	Gosselin et al.
LINC00865	Gosselin et al.
LOC101927051	Gosselin et al.
DOK3	Gosselin et al.
ALOX5AP	Gosselin et al.
RREB1	Gosselin et al.
DEF6	Gosselin et al.
HFE	Gosselin et al.
NLRP1	Gosselin et al.
SERPINB9	Gosselin et al.
MAP4K1	Gosselin et al.
EDA2R	Gosselin et al.
NCK1-AS1	Gosselin et al.
SLC16A3	Gosselin et al.
GAL3ST4	Gosselin et al.
IGF2BP3	Gosselin et al.
KYNU	Gosselin et al.
FLJ32255	Gosselin et al.
DPYS	Gosselin et al.
CASP1	Gosselin et al.
ABI3	Gosselin et al.
C5AR1	Gosselin et al.
LYZ	Gosselin et al.
CCL20	Gosselin et al.
PUS10	Gosselin et al.
OXER1	Gosselin et al.
TREM2	Gosselin et al.
SAMD9L	Gosselin et al.
CFLAR-AS1	Gosselin et al.
IRAK2	Gosselin et al.
RCN3	Gosselin et al.
FOLR2	Gosselin et al.
DTX2P1-UPK3BP1-PMS2P11	Gosselin et al.
WNT2B	Gosselin et al.
HCLS1	Gosselin et al.
HLA-DMA	Gosselin et al.
HTR2B	Gosselin et al.
STX11	Gosselin et al.
HPGDS	Gosselin et al.
PPP1R3B	Gosselin et al.
LOC100131626	Gosselin et al.
SPP1	Gosselin et al.
MYOF	Gosselin et al.
DDI2	Gosselin et al.
B4GALT1	Gosselin et al.
LOC101928126	Gosselin et al.
FERMT3	Gosselin et al.
LILRA6	Gosselin et al.
IER3	Gosselin et al.
LOC101928020	Gosselin et al.
LTB4R2	Gosselin et al.
PDE3B	Gosselin et al.
ST6GAL1	Gosselin et al.
ZNF141	Gosselin et al.
TMIGD3	Gosselin et al.
TMEM52B	Gosselin et al.
PLAC8	Gosselin et al.
ZNF888	Gosselin et al.
CD58	Gosselin et al.
LY96	Gosselin et al.
DUSP27	Gosselin et al.
ITPRIPL2	Gosselin et al.
FUT4	Gosselin et al.
ENTPD1-AS1	Gosselin et al.
MX2	Gosselin et al.
CLCN5	Gosselin et al.
PAG1	Gosselin et al.
SFXN2	Gosselin et al.
MERTK	Gosselin et al.
LOC102724050	Gosselin et al.
SPNS3	Gosselin et al.
LRMP	Gosselin et al.
HIST1H2AE	Gosselin et al.
IFI16	Gosselin et al.
TTF2	Gosselin et al.
APOBEC3G	Gosselin et al.
ARHGAP27	Gosselin et al.
KCNMB1	Gosselin et al.
LOC102724265	Gosselin et al.
HIST1H2AD	Gosselin et al.
RNU5A-1	Gosselin et al.
TNFAIP3	Gosselin et al.
TNFRSF10D	Gosselin et al.
P2RY12	Gosselin et al.
CARD8-AS1	Gosselin et al.
GNGT2	Gosselin et al.
IFNGR1	Gosselin et al.
KBTBD8	Gosselin et al.
HK3	Gosselin et al.
SOWAHD	Gosselin et al.
LCP1	Gosselin et al.
POC1B-GALNT4	Gosselin et al.
INPP5D	Gosselin et al.
ODF3B	Gosselin et al.
ZFHX3	Gosselin et al.
HLA-DQA1	Gosselin et al.
NFKBID	Gosselin et al.
SUMO4	Gosselin et al.
HIST1H4E	Gosselin et al.
FYB	Gosselin et al.
C10orf128	Gosselin et al.
PLAU	Gosselin et al.
IL17RA	Gosselin et al.
APBB1IP	Gosselin et al.
MYC	Gosselin et al.
GIMAP8	Gosselin et al.
CD1D	Gosselin et al.
PCED1B	Gosselin et al.
CASP8	Gosselin et al.
TGFBR2	Gosselin et al.
POMK	Gosselin et al.
SUSD6	Gosselin et al.
IL15RA	Gosselin et al.
MR1	Gosselin et al.
LRRK1	Gosselin et al.
TMEM86A	Gosselin et al.
HACD4	Gosselin et al.
MLKL	Gosselin et al.
PLK3	Gosselin et al.
RUBCNL	Gosselin et al.
CD83	Gosselin et al.
HLA-DRB6	Gosselin et al.
IL13RA1	Gosselin et al.
ELF1	Gosselin et al.
ZNF460	Gosselin et al.
GPR160	Gosselin et al.
UNC93B1	Gosselin et al.
JAK2	Gosselin et al.
DPP4	Gosselin et al.
OLFML3	Gosselin et al.
LYL1	Gosselin et al.
HLA-DPA1	Gosselin et al.
MRC2	Gosselin et al.
ANG	Gosselin et al.
FKBP5	Gosselin et al.
CD68	Gosselin et al.
ACRBP	Gosselin et al.
TLDC2	Gosselin et al.
ERAP2	Gosselin et al.
GIMAP2	Gosselin et al.
GMIP	Gosselin et al.
UBR5-AS1	Gosselin et al.
DENND3	Gosselin et al.
CD4	Gosselin et al.
APOBEC3F	Gosselin et al.
HAMP	Gosselin et al.
ATM	Gosselin et al.
LIPC	Gosselin et al.
TMIGD2	Gosselin et al.
FBP1	Gosselin et al.
SLC9A7P1	Gosselin et al.
HLX	Gosselin et al.
SLC17A9	Gosselin et al.
ANKRD44	Gosselin et al.
GBGT1	Gosselin et al.
LINC00539	Gosselin et al.
A2M	Gosselin et al.
ZNF660	Gosselin et al.
DENND1C	Gosselin et al.
TAS2R5	Gosselin et al.
SUSD3	Gosselin et al.
PYCARD-AS1	Gosselin et al.
PDCD6IPP2	Gosselin et al.
NCMAP	Gosselin et al.
ZC3H12A	Gosselin et al.
PALD1	Gosselin et al.
APOBEC3C	Gosselin et al.
RNU12	Gosselin et al.
MMP14	Gosselin et al.
DLEC1	Gosselin et al.
DAB2	Gosselin et al.
PROX2	Gosselin et al.
TCIRG1	Gosselin et al.
IFI30	Gosselin et al.
C1QC	Gosselin et al.
MGAT4A	Gosselin et al.
ZMYND15	Gosselin et al.
REEP4	Gosselin et al.
LOC100130298	Gosselin et al.
EPSTI1	Gosselin et al.
FHOD1	Gosselin et al.
N4BP2L2-IT2	Gosselin et al.
DZIP1L	Gosselin et al.
ZNF816	Gosselin et al.
UBA7	Gosselin et al.
DPEP2	Gosselin et al.
IL16	Gosselin et al.
SIRPB1	Gosselin et al.
HCG4B	Gosselin et al.
LINC01094	Gosselin et al.
LOC100130357	Gosselin et al.
MYO1G	Gosselin et al.
RGL3	Gosselin et al.
LOC283922	Gosselin et al.
PGM5P2	Gosselin et al.
VNN2	Gosselin et al.
LAPTM5	Gosselin et al.
TNFSF13B	Gosselin et al.
CCDC18	Gosselin et al.
TMEM173	Gosselin et al.
KCTD12	Gosselin et al.
IKBKE	Gosselin et al.
RPS6KA1	Gosselin et al.
LOC648987	Gosselin et al.
SLC4A7	Gosselin et al.
CXCL8	Gosselin et al.
ABCA1	Gosselin et al.
SSH2	Gosselin et al.
FAM46A	Gosselin et al.
P3H2	Gosselin et al.
IGSF10	Gosselin et al.
CEP135	Gosselin et al.
LOC102723809	Gosselin et al.
C1QB	Gosselin et al.
N4BP2	Gosselin et al.
AGAP5	Gosselin et al.
PLEKHM1P1	Gosselin et al.
BISPR	Gosselin et al.
ARHGAP15	Gosselin et al.
CFAP74	Gosselin et al.
ARHGAP4	Gosselin et al.
LOC101926963	Gosselin et al.
OAS1	Gosselin et al.
SPTY2D1-AS1	Gosselin et al.
CCDC88B	Gosselin et al.
LYVE1	Gosselin et al.
MKNK1	Gosselin et al.
LOC400043	Gosselin et al.
CECR1	Gosselin et al.
B4GALT4-AS1	Gosselin et al.
TNFRSF12A	Gosselin et al.
ATP11C	Gosselin et al.
PTGS2	Gosselin et al.
WAS	Gosselin et al.
BACH1	Gosselin et al.
SGK1	Gosselin et al.
STXBP2	Gosselin et al.
ASGR2	Gosselin et al.
HSPA1B	Gosselin et al.
RAPGEF6	Gosselin et al.
FANCD2	Gosselin et al.
HLX-AS1	Gosselin et al.
STAMBPL1	Gosselin et al.
PLD4	Gosselin et al.
SKIL	Gosselin et al.
LPAR2	Gosselin et al.
KLRA1P	Gosselin et al.
BCO2	Gosselin et al.
GCNT2	Gosselin et al.
TIMM23B	Gosselin et al.
FOSB	Gosselin et al.
NPL	Gosselin et al.
LOC100289580	Gosselin et al.
PLAUR	Gosselin et al.
RNF125	Gosselin et al.
CASP4	Gosselin et al.
RNFT1	Gosselin et al.
CYFIP1	Gosselin et al.
CASP10	Gosselin et al.
SELPLG	Gosselin et al.
IER5	Gosselin et al.
ADPRH	Gosselin et al.
LMLN-AS1	Gosselin et al.
EML4	Gosselin et al.
GLIPR1	Gosselin et al.
NHLRC2	Gosselin et al.
RNVU1-19	Gosselin et al.
CD93	Gosselin et al.
RNF149	Gosselin et al.
PARP14	Gosselin et al.
MAML3	Gosselin et al.
SH2B3	Gosselin et al.
RNASET2	Gosselin et al.
TMPRSS4-AS1	Gosselin et al.
USP53	Gosselin et al.
SLC22A18	Gosselin et al.
LMNTD2	Gosselin et al.
RNF122	Gosselin et al.
TNFRSF10B	Gosselin et al.
KIAA1551	Gosselin et al.
NLRC5	Gosselin et al.
CMTM7	Gosselin et al.
ADPGK	Gosselin et al.
MFSD4B	Gosselin et al.
PRDM1	Gosselin et al.
ZNF846	Gosselin et al.
IL1RAP	Gosselin et al.
LOC100128108	Gosselin et al.
CREB3L2	Gosselin et al.
C1orf162	Gosselin et al.
CXCL16	Gosselin et al.
LINC01529	Gosselin et al.
RYR1	Gosselin et al.
HMOX1	Gosselin et al.
ZNF100	Gosselin et al.
LOC100505549	Gosselin et al.
PYGL	Gosselin et al.
FGD3	Gosselin et al.
CLEC2D	Gosselin et al.
CCDC134	Gosselin et al.
CD37	Gosselin et al.
ZNF808	Gosselin et al.
CLEC4A	Gosselin et al.
HLA-DRB1	Gosselin et al.
NBPF8	Gosselin et al.
PLD1	Gosselin et al.
EP400NL	Gosselin et al.
ZFP36L2	Gosselin et al.
TEP1	Gosselin et al.
SYT6	Gosselin et al.
ZCCHC6	Gosselin et al.
LOC100129917	Gosselin et al.
FMO4	Gosselin et al.
COLGALT1	Gosselin et al.
IL4R	Gosselin et al.
STARD5	Gosselin et al.
SORL1	Gosselin et al.
CEBPA	Gosselin et al.
FFAR4	Gosselin et al.
BHLHE41	Gosselin et al.
FAM111A	Gosselin et al.
SP110	Gosselin et al.
SERPINF2	Gosselin et al.
CNTRL	Gosselin et al.
DHRS9	Gosselin et al.
ZNF85	Gosselin et al.
LRCH3	Gosselin et al.
KANTR	Gosselin et al.
FAM212A	Gosselin et al.
ITGB7	Gosselin et al.
ZNF267	Gosselin et al.
NAGA	Gosselin et al.
BTAF1	Gosselin et al.
JAK3	Gosselin et al.
RGS2	Gosselin et al.
TBC1D2B	Gosselin et al.
TMPO-AS1	Gosselin et al.
LOC101928143	Gosselin et al.
HLA-DQB1	Gosselin et al.
SPI1	Gosselin et al.
RNF213	Gosselin et al.
ASXL2	Gosselin et al.
SPPL2A	Gosselin et al.
ITIH4-AS1	Gosselin et al.
MAF	Gosselin et al.
C1QA	Gosselin et al.
HLA-DRA	Gosselin et al.
SLA	Gosselin et al.
LY86	Gosselin et al.
STAT5A	Gosselin et al.
CMTM6	Gosselin et al.
LOC100506388	Gosselin et al.
PTPRJ	Gosselin et al.
RNU5E-1	Gosselin et al.
ZBTB26	Gosselin et al.
ZNRF2	Gosselin et al.
RASSF10	Gosselin et al.
LTB4R	Gosselin et al.
TVP23C	Gosselin et al.
TLR4	Gosselin et al.
ABHD15	Gosselin et al.
MSH5	Gosselin et al.
LRCH1	Gosselin et al.
ANXA2R	Gosselin et al.
SPATA13	Gosselin et al.
TSSK4	Gosselin et al.
FMNL3	Gosselin et al.
APOC2	Gosselin et al.
MEF2C	McQuade et al.’s study
PICALM	McQuade et al.’s study
SORL1	McQuade et al.’s study
FERMT2	McQuade et al.’s study
CLPTM1	McQuade et al.’s study
PTK2B	McQuade et al.’s study
CLU	McQuade et al.’s study
ADAM10	McQuade et al.’s study
CELF1	McQuade et al.’s study
CD2AP	McQuade et al.’s study
GAB2	McQuade et al.’s study
MS4A6A	McQuade et al.’s study
TYROBP	McQuade et al.’s study
MS4A4A	McQuade et al.’s study
APOC1	McQuade et al.’s study
TREM2	McQuade et al.’s study
INPP5D	McQuade et al.’s study
CD33	McQuade et al.’s study
PLCG2	McQuade et al.’s study
CASS4	McQuade et al.’s study
ABI3	McQuade et al.’s study
BIN1	McQuade et al.’s study
KAT8	McQuade et al.’s study
RELB	McQuade et al.’s study
ZCWPW1	McQuade et al.’s study
PVRL2	McQuade et al.’s study
BLOC1S3	McQuade et al.’s study
DSG2	McQuade et al.’s study
CR1	McQuade et al.’s study
BCAM	McQuade et al.’s study
PVR	McQuade et al.’s study
MARK4	McQuade et al.’s study
APOE	McQuade et al.’s study
BCKDK	McQuade et al.’s study
RIN1	McQuade et al.’s study
FAM180B	McQuade et al.’s study
PPP1R37	McQuade et al.’s study
BCL3	McQuade et al.’s study
TRAPPC6A	McQuade et al.’s study
TREML2	McQuade et al.’s study
TOMM40	McQuade et al.’s study
CEACAM19	McQuade et al.’s study
Gosselin D, Skola D, Coufal NG, Holtman IR, Schlachetzki JC, Sajti E, et al. An environment-dependent transcriptional network specifies human microglia identity. Science. 2017;356:eaal3222.
McQuade et al.’s study
